# Supplementary material for: Elimination of Dog-Mediated Human Rabies Deaths by 2030: Needs Assessment and Alternatives for Progress Based on Dog Vaccination
Source: PubMed Central journal article supplement (PMC5300989; doi:10.3389/fvets.2017.00009), 2017-02-10
Supplement: data_sheet_1.pdf [file data_sheet_1.pdf]

## *Supplementary Material*

# **Elimination of Dog-Mediated Human Rabies Deaths by 2030: Needs Assessment and Alternatives for Progress**

**Ryan M. Wallace\***, Eduardo A. Undurraga, Jesse D. Blanton, Julie Cleaton, and Richard Franka

### **Contents**

|     |                                                                            |    |
|-----|----------------------------------------------------------------------------|----|
| 1   | Appendix A. Country-specific estimates for rabies elimination in 2030..... | 2  |
| 1.1 | Dog populations and vaccines required .....                                | 2  |
| 1.2 | Vaccination costs .....                                                    | 9  |
| 1.3 | Animal health workers vaccination capacity .....                           | 14 |
| 2   | Appendix 2. Human development index and dog rabies elimination .....       | 20 |
| 3   | References for the supplementary material .....                            | 21 |

---

\* **Correspondence:** Ryan Wallace: [euk5@cdc.gov](mailto:euk5@cdc.gov)

## 1 Appendix A. Country-specific estimates for rabies elimination in 2030

### 1.1 Dog populations and vaccines required

**Table S1.** Estimates of the dog population by country and dog vaccines required to reach goal of 70% of dog vaccination coverage, by country

| Country             | Country code | Cluster       | WB Human Population 2015 | Urban (%) | HDI  | Urban Dog Pop. | Rural Dog Pop. | Total Dog Population | Vax dogs, endemic countries | Current Unvax Dogs | Vax to reach goal |
|---------------------|--------------|---------------|--------------------------|-----------|------|----------------|----------------|----------------------|-----------------------------|--------------------|-------------------|
| Afghanistan         | AFG          | Eurasia       | 32,526,562               | 27        | 0.40 | 1,158,076      | 1,667,202      | 2,825,278            | 28,253                      | 2,797,025          | 1,949,442         |
| Albania             | ALB          | EasternEurope | 2,889,167                | 57        | 0.74 | 255,167        | 189,320        | 444,487              | 207,576                     | 236,912            | 103,566           |
| Algeria             | DZA          | North Africa  | 39,666,519               | 71        | 0.70 | 1,323,346      | 1,569,132      | 2,892,479            | 685,517                     | 2,206,961          | 1,339,218         |
| Andorra             | AND          | EU            | 70,473                   | 85        | 0.84 | 9,228          | 1,614          | 10,842               | 0                           | 3,253              | 0                 |
| Angola              | AGO          | Congo Basin   | 25,021,974               | 44        | 0.49 | 519,914        | 1,891,864      | 2,411,778            | 12,059                      | 2,399,719          | 1,676,186         |
| Antigua and Barbuda | ATG          | Caribbean     | 91,818                   | 24        | 0.76 | 2,910          | 9,332          | 12,242               | 0                           | 5,497              | 1,824             |
| Argentina           | ARG          | Southern Cone | 43,416,755               | 92        | 0.80 | 5,311,374      | 477,526        | 5,788,901            | 1,195,982                   | 4,592,918          | 2,856,248         |
| Armenia             | ARM          | EasternEurope | 3,017,712                | 63        | 0.72 | 290,968        | 173,296        | 464,263              | 216,811                     | 247,452            | 108,173           |
| Australia           | AUS          | Oceania       | 23,781,169               | 89        | 0.93 | 2,835,445      | 175,897        | 3,011,342            | 0                           | 903,403            | 0                 |
| Austria             | AUT          | EU            | 8,611,088                | 66        | 0.89 | 873,933        | 450,850        | 1,324,783            | 0                           | 397,435            | 0                 |
| Azerbaijan          | AZE          | Eurasia       | 9,651,349                | 55        | 0.73 | 811,010        | 673,813        | 1,484,823            | 313,298                     | 1,171,525          | 726,078           |
| Bahamas             | BHS          | Caribbean     | 388,019                  | 83        | 0.77 | 42,876         | 8,860          | 51,736               | 0                           | 23,229             | 7,709             |
| Bahrain             | BHR          | Middle East   | 1,377,237                | 89        | 0.81 | 163,019        | 10,811         | 173,830              | 32,159                      | 141,671            | 89,522            |
| Bangladesh          | BGD          | Asia 3        | 160,995,642              | 34        | 0.50 | 7,357,930      | 7,399,382      | 14,757,312           | 750,409                     | 14,006,903         | 9,579,709         |
| Barbados            | BRB          | Caribbean     | 284,215                  | 31        | 0.79 | 11,928         | 25,968         | 37,895               | 0                           | 17,015             | 5,646             |
| Belarus             | BLR          | EasternEurope | 9,513,000                | 77        | 0.76 | 1,122,051      | 341,487        | 1,463,538            | 683,472                     | 780,066            | 341,004           |
| Belgium             | BEL          | EU            | 11,285,721               | 98        | 0.89 | 1,699,074      | 37,191         | 1,736,265            | 0                           | 520,879            | 0                 |
| Belize              | BLZ          | CA & Mex*     | 359,287                  | 44        | 0.70 | 21,065         | 26,840         | 47,905               | 0                           | 15,330             | 958               |
| Benin               | BEN          | West Africa   | 10,879,829               | 44        | 0.43 | 225,551        | 824,074        | 1,049,625            | 8,397                       | 1,041,228          | 726,340           |
| Bhutan              | BTN          | Asia 3        | 774,830                  | 39        | 0.52 | 39,923         | 33,245         | 73,168               | 7,317                       | 65,852             | 43,901            |
| Bolivia             | BOL          | Andean        | 10,724,705               | 69        | 0.66 | 979,695        | 450,266        | 1,429,961            | 1,110,567                   | 319,393            | 0                 |
| Bosnia Herzegovina  | BIH          | EasternEurope | 3,810,416                | 40        | 0.73 | 233,121        | 353,097        | 586,218              | 273,764                     | 312,454            | 136,589           |

| Country                  | Country code | Cluster       | WB Human Population 2015 | Urban (%) | HDI  | Urban Dog Pop. | Rural Dog Pop. | Total Dog Population | Vax dogs, endemic countries | Current Unvax Dogs | Vax to reach goal |
|--------------------------|--------------|---------------|--------------------------|-----------|------|----------------|----------------|----------------------|-----------------------------|--------------------|-------------------|
| Botswana                 | BWA          | SADC          | 2,262,485                | 57        | 0.63 | 61,305         | 130,111        | 191,416              | 957                         | 190,459            | 133,034           |
| Brazil                   | BRA          | Brazil        | 207,847,528              | 86        | 0.72 | 23,746,442     | 3,966,562      | 27,713,004           | 19,080,403                  | 8,632,601          | 318,700           |
| Brunei Darussalam        | BRN          | Asia 1        | 423,188                  | 77        | 0.84 | 43,561         | 6,747          | 50,308               | 0                           | 15,092             | 0                 |
| Bulgaria                 | BGR          | EasternEurope | 7,177,991                | 74        | 0.77 | 816,612        | 287,694        | 1,104,306            | 515,711                     | 588,595            | 257,303           |
| Burkina Faso             | BFA          | West Africa   | 18,105,570               | 30        | 0.33 | 255,007        | 1,716,139      | 1,971,146            | 15,769                      | 1,955,376          | 1,364,033         |
| Burundi                  | BDI          | Congo Basin   | 11,178,921               | 12        | 0.32 | 63,577         | 1,328,524      | 1,392,102            | 6,961                       | 1,385,141          | 967,511           |
| Cote d'Ivoire            | CIV          | West Africa   | 22,701,556               | 54        | 0.40 | 580,175        | 1,405,656      | 1,985,830            | 15,887                      | 1,969,944          | 1,374,195         |
| Cambodia                 | CMR          | Asia 2        | 15,577,899               | 21        | 0.52 | 430,428        | 863,615        | 1,294,042            | 7,764                       | 1,286,278          | 898,065           |
| Cameroon                 | CAN          | West Africa   | 23,344,179               | 54        | 0.48 | 598,811        | 1,439,106      | 2,037,917            | 16,303                      | 2,021,613          | 1,410,238         |
| Canada                   | CSS          | NorthAmerica  | 35,851,774               | 82        | 0.91 | 3,911,572      | 868,665        | 4,780,237            | 0                           | 1,434,071          | 0                 |
| Cape Verde               | CPV          | West Africa   | 520,502                  | 66        | 0.57 | 16,088         | 24,248         | 40,336               | 0                           | 40,014             | 27,913            |
| Central African Rep.     | CAF          | Congo Basin   | 4,900,274                | 40        | 0.34 | 92,544         | 397,074        | 489,618              | 2,448                       | 487,170            | 340,285           |
| Chad                     | TCD          | West Africa   | 14,037,472               | 22        | 0.33 | 148,791        | 1,470,691      | 1,619,481            | 12,956                      | 1,606,525          | 1,120,681         |
| Chile                    | CHL          | Southern Cone | 17,948,141               | 90        | 0.81 | 2,142,529      | 250,556        | 2,393,085            | 0                           | 842,366            | 124,440           |
| China                    | CHN          | China         | 1,371,220,000            | 56        | 0.69 | 15,788,619     | 12,601,029     | 28,389,648           | 4,031,330                   | 24,358,318         | 15,841,424        |
| Colombia                 | COL          | Andean        | 48,228,704               | 76        | 0.71 | 4,915,212      | 1,515,282      | 6,430,494            | 4,707,879                   | 1,722,614          | 0                 |
| Comoros                  | COM          | SADC          | 788,474                  | 28        | 0.43 | 10,524         | 76,401         | 86,925               | 0                           | 86,490             | 60,413            |
| Congo                    | COG          | Congo Basin   | 4,620,330                | 65        | 0.53 | 142,489        | 216,157        | 358,646              | 277                         | 358,369            | 250,775           |
| Cook Islands             | COK          | Oceania       | 18,027                   | 100       | 0.91 | 2,404          | 0              | 2,404                | 0                           | 721                | 0                 |
| Costa Rica               | CRI          | CA & Mex*     | 4,807,850                | 77        | 0.74 | 492,458        | 148,588        | 641,047              | 0                           | 500,016            | 307,702           |
| Croatia                  | HRV          | EasternEurope | 4,224,404                | 59        | 0.80 | 383,212        | 266,696        | 649,908              | 303,507                     | 346,401            | 151,429           |
| Cuba                     | CUB          | Caribbean     | 11,389,562               | 77        | 0.78 | 1,170,452      | 348,156        | 1,518,608            | 981,703                     | 536,905            | 81,323            |
| Cyprus                   | CYP          | EasternEurope | 1,165,300                | 67        | 0.84 | 119,974        | 59,303         | 179,277              | 0                           | 95,555             | 41,772            |
| Czech Republic           | CZE          | EasternEurope | 10,551,219               | 73        | 0.87 | 1,184,853      | 438,411        | 1,623,264            | 758,065                     | 865,200            | 378,221           |
| North Korea <sup>a</sup> | PRK          | Asia 2        | 25,155,317               | 61        | 0.77 | 2,041,773      | 688,253        | 2,730,026            | 16,380                      | 2,713,646          | 1,894,638         |
| DRC <sup>b</sup>         | COD          | Congo Basin   | 77,266,814               | 42        | 0.29 | 1,548,762      | 6,004,467      | 7,553,229            | 37,766                      | 7,515,463          | 5,249,494         |
| Denmark                  | DNK          | EU            | 5,676,002                | 88        | 0.90 | 765,614        | 107,617        | 873,231              | 0                           | 261,969            | 0                 |
| Djibouti                 | DJI          | North Africa  | 887,861                  | 77        | 0.43 | 32,391         | 27,184         | 59,576               | 60                          | 59,516             | 41,643            |
| Dominica                 | DMA          | Caribbean     | 72,680                   | 70        | 0.72 | 6,739          | 2,952          | 9,691                | 0                           | 4,351              | 1,444             |
| Dominican Republic       | DOM          | Caribbean     | 10,528,391               | 79        | 0.69 | 1,108,710      | 295,076        | 1,403,785            | 374,758                     | 1,029,027          | 607,891           |
| Ecuador                  | ECU          | Andean        | 16,144,363               | 64        | 0.72 | 1,372,099      | 780,483        | 2,152,582            | 1,689,296                   | 463,285            | 0                 |

| Country           | Country code | Cluster       | WB Human Population 2015 | Urban (%) | HDI   | Urban Dog Pop. | Rural Dog Pop. | Total Dog Population | Vax dogs, endemic countries | Current Unvax Dogs | Vax to reach goal |
|-------------------|--------------|---------------|--------------------------|-----------|-------|----------------|----------------|----------------------|-----------------------------|--------------------|-------------------|
| Egypt             | EGY          | North Africa  | 91,508,084               | 43        | 0.64  | 1,861,887      | 7,031,902      | 8,893,789            | 2,107,828                   | 6,785,961          | 4,117,824         |
| El Salvador       | SLV          | CA & Mex*     | 6,126,583                | 67        | 0.67  | 545,070        | 271,808        | 816,878              | 536,689                     | 280,189            | 35,126            |
| Equatorial Guinea | GNQ          | Congo Basin   | 845,060                  | 40        | 0.54  | 15,914         | 68,606         | 84,520               | 423                         | 84,098             | 58,742            |
| Eritrea           | ERI          | North Africa  | 5,222,000                | 38        | 0.35  | 92,863         | 439,636        | 532,499              | 532                         | 531,966            | 372,217           |
| Estonia           | EST          | EasternEurope | 1,311,998                | 68        | 0.84  | 136,323        | 65,523         | 201,846              | 94,262                      | 107,584            | 47,030            |
| Ethiopia          | ETH          | SADC          | 99,390,750               | 19        | 0.36  | 912,895        | 10,815,863     | 11,728,757           | 58,644                      | 11,670,113         | 8,151,486         |
| Fiji              | FJI          | Oceania       | 892,145                  | 54        | 0.69  | 63,911         | 28,868         | 92,779               | 0                           | 27,834             | 0                 |
| Finland           | FIN          | EU            | 5,482,013                | 84        | 0.88  | 710,309        | 133,078        | 843,387              | 0                           | 253,016            | 0                 |
| France            | FRA          | EU            | 66,808,385               | 80        | 0.88  | 8,173,235      | 2,104,978      | 10,278,213           | 0                           | 3,083,464          | 0                 |
| French Guiana     | GUF          | Americas      | 276,000                  | 84        | 0.816 | 31,059         | 5,741          | 36,800               | 0                           | 11,040             | 0                 |
| Gabon             | GAB          | Congo Basin   | 1,725,292                | 87        | 0.67  | 70,929         | 29,945         | 100,875              | 794                         | 100,081            | 69,819            |
| Gambia            | GMB          | West Africa   | 1,990,924                | 60        | 0.42  | 56,001         | 108,608        | 164,609              | 1,317                       | 163,292            | 113,909           |
| Georgia           | GEO          | Eurasia       | 3,679,000                | 54        | 0.73  | 303,608        | 262,392        | 566,000              | 119,426                     | 446,574            | 276,774           |
| Germany           | DEU          | EU            | 81,413,145               | 75        | 0.91  | 9,431,525      | 3,093,574      | 12,525,099           | 0                           | 3,757,530          | 0                 |
| Ghana             | GHA          | West Africa   | 27,409,893               | 54        | 0.54  | 698,720        | 1,702,303      | 2,401,022            | 19,208                      | 2,381,814          | 1,661,507         |
| Greece            | GRC          | EasternEurope | 10,823,732               | 78        | 0.86  | 1,298,964      | 366,225        | 1,665,190            | 0                           | 887,546            | 387,989           |
| Grenada           | GRD          | Caribbean     | 106,825                  | 36        | 0.75  | 5,069          | 9,174          | 14,243               | 0                           | 6,395              | 2,122             |
| Guatemala         | GTM          | CA & Mex*     | 16,342,897               | 52        | 0.57  | 1,123,759      | 1,055,294      | 2,179,053            | 1,372,803                   | 806,250            | 152,534           |
| Guinea            | GIN          | Congo Basin   | 12,608,590               | 37        | 0.34  | 221,013        | 1,070,691      | 1,291,704            | 6,459                       | 1,285,245          | 897,734           |
| Guinea-Bissau     | GNB          | West Africa   | 1,844,325                | 49        | 0.35  | 42,917         | 126,281        | 169,199              | 1,354                       | 167,845            | 117,085           |
| Guyana            | GUY          | CA & Mex*     | 767,085                  | 29        | 0.63  | 29,203         | 73,075         | 102,278              | 69,549                      | 32,729             | 2,046             |
| Haiti             | HTI          | Caribbean     | 10,711,067               | 59        | 0.45  | 837,534        | 590,608        | 1,428,142            | 448,572                     | 979,570            | 551,127           |
| Honduras          | HND          | CA & Mex*     | 8,075,060                | 55        | 0.63  | 589,264        | 487,411        | 1,076,675            | 887,998                     | 188,676            | 0                 |
| Hungary           | HUN          | EasternEurope | 9,844,686                | 71        | 0.82  | 1,078,781      | 435,786        | 1,514,567            | 707,303                     | 807,264            | 352,894           |
| Iceland           | ISL          | EU            | 330,823                  | 94        | 0.90  | 47,912         | 2,984          | 50,896               | 0                           | 15,269             | 0                 |
| India             | IND          | India         | 1,311,050,527            | 33        | 0.55  | 57,243,962     | 61,658,798     | 118,902,760          | 17,835,414                  | 101,067,346        | 65,396,518        |
| Indonesia         | IDN          | Indonesia     | 257,563,815              | 54        | 0.62  | 18,455,993     | 8,331,739      | 26,787,732           | 6,375,480                   | 20,412,252         | 12,375,932        |
| Iran <sup>c</sup> | IRN          | Middle East   | 79,109,272               | 73        | 0.71  | 7,739,524      | 1,472,926      | 9,212,450            | 1,674,991                   | 7,537,459          | 4,773,724         |
| Iraq              | IRQ          | Middle East   | 36,423,395               | 69        | 0.57  | 3,373,826      | 777,601        | 4,151,428            | 768,014                     | 3,383,413          | 2,137,985         |
| Ireland           | IRL          | EU            | 4,640,703                | 63        | 0.91  | 451,512        | 262,442        | 713,954              | 0                           | 214,186            | 0                 |
| Israel            | ISR          | Middle East   | 8,380,400                | 92        | 0.89  | 1,029,560      | 46,063         | 1,075,623            | 679,567                     | 396,056            | 73,369            |

| Country                 | Country code | Cluster       | WB Human Population 2015 | Urban (%) | HDI  | Urban Dog Pop. | Rural Dog Pop. | Total Dog Population | Vax dogs, endemic countries | Current Unvax Dogs | Vax to reach goal |
|-------------------------|--------------|---------------|--------------------------|-----------|------|----------------|----------------|----------------------|-----------------------------|--------------------|-------------------|
| Italy                   | ITA          | EU            | 60,802,085               | 69        | 0.87 | 6,451,008      | 2,903,159      | 9,354,167            | 0                           | 2,806,250          | 0                 |
| Jamaica                 | JAM          | Caribbean     | 2,725,941                | 55        | 0.73 | 199,132        | 164,327        | 363,459              | 0                           | 163,193            | 54,155            |
| Japan                   | JPN          | Asia 1        | 126,958,472              | 93        | 0.90 | 15,827,151     | 577,262        | 16,404,412           | 0                           | 4,921,324          | 0                 |
| Jordan                  | JOR          | Middle East   | 7,594,547                | 84        | 0.70 | 847,339        | 86,679         | 934,018              | 172,793                     | 761,224            | 481,019           |
| Kazakhstan              | KAZ          | Eurasia       | 17,544,126               | 53        | 0.75 | 1,245,563      | 573,595        | 1,819,158            | 383,842                     | 1,435,315          | 889,568           |
| Kenya                   | KEN          | SADC          | 46,050,302               | 26        | 0.51 | 556,557        | 4,628,553      | 5,185,110            | 25,926                      | 5,159,185          | 3,603,652         |
| Kiribati                | KIR          | Oceania       | 112,423                  | 44        | 0.62 | 6,641          | 4,379          | 11,020               | 0                           | 3,306              | 0                 |
| Kuwait                  | KWT          | Middle East   | 3,892,115                | 98        | 0.76 | 510,344        | 4,513          | 514,857              | 95,249                      | 419,609            | 265,151           |
| Kyrgyzstan              | KGZ          | Eurasia       | 5,957,000                | 36        | 0.62 | 283,609        | 267,828        | 551,436              | 116,353                     | 435,083            | 269,652           |
| Lao <sup>d</sup>        | LAO          | Asia 2        | 6,802,023                | 39        | 0.52 | 350,204        | 291,992        | 642,197              | 8,927                       | 633,270            | 440,611           |
| Latvia                  | LVA          | EasternEurope | 1,978,440                | 67        | 0.81 | 205,094        | 99,281         | 304,375              | 142,143                     | 162,232            | 70,919            |
| Lebanon                 | LBN          | Middle East   | 5,850,743                | 88        | 0.74 | 684,865        | 49,948         | 734,813              | 135,940                     | 598,872            | 378,429           |
| Lesotho                 | LSO          | SADC          | 2,135,022                | 27        | 0.45 | 27,506         | 209,717        | 237,222              | 1,186                       | 236,036            | 164,870           |
| Liberia                 | LBR          | West Africa   | 4,503,438                | 50        | 0.33 | 105,578        | 306,106        | 411,684              | 3,293                       | 408,391            | 284,885           |
| Libya                   | LBY          | North Africa  | 6,278,438                | 79        | 0.76 | 232,640        | 181,956        | 414,596              | 98,259                      | 316,337            | 191,958           |
| Lithuania               | LTU          | EasternEurope | 2,910,199                | 67        | 0.81 | 297,772        | 149,951        | 447,723              | 209,087                     | 238,636            | 104,319           |
| Luxembourg              | LUX          | EU            | 569,676                  | 90        | 0.87 | 79,018         | 8,624          | 87,642               | 0                           | 26,293             | 0                 |
| Madagascar              | MDG          | SADC          | 24,235,390               | 35        | 0.48 | 401,313        | 2,125,345      | 2,526,658            | 12,633                      | 2,514,025          | 1,756,028         |
| Malawi                  | MWI          | SADC          | 17,215,232               | 16        | 0.40 | 132,135        | 1,947,834      | 2,079,969            | 10,400                      | 2,069,569          | 1,445,578         |
| Malaysia                | MYS          | Asia 1        | 30,331,007               | 75        | 0.76 | 3,021,171      | 536,519        | 3,557,690            | 0                           | 1,067,307          | 0                 |
| Maldives                | MDV          | Asia 1        | 409,163                  | 46        | 0.66 | 24,842         | 15,584         | 40,426               | 0                           | 12,128             | 0                 |
| Mali                    | MLI          | West Africa   | 17,599,694               | 40        | 0.36 | 331,372        | 1,429,000      | 1,760,372            | 14,083                      | 1,746,289          | 1,218,178         |
| Malta                   | MLT          | EasternEurope | 431,333                  | 95        | 0.83 | 63,311         | 3,048          | 66,359               | 0                           | 35,369             | 15,462            |
| Marshall Islands        | MHL          | Oceania       | 52,993                   | 73        | 0.56 | 5,136          | 1,012          | 6,148                | 0                           | 1,844              | 0                 |
| Mauritania              | MRT          | West Africa   | 4,067,564                | 60        | 0.45 | 114,849        | 220,643        | 335,493              | 2,684                       | 332,809            | 232,161           |
| Mauritius               | MUS          | SADC          | 1,262,605                | 40        | 0.73 | 23,627         | 102,935        | 126,562              | 0                           | 125,929            | 87,960            |
| Mexico                  | MEX          | CA & Mex*     | 127,017,224              | 79        | 0.77 | 13,420,809     | 3,514,821      | 16,935,630           | 12,955,757                  | 3,979,873          | 0                 |
| Micronesia <sup>e</sup> | FSM          | Oceania       | 104,460                  | 22        | 0.64 | 3,123          | 5,667          | 8,790                | 0                           | 2,637              | 0                 |
| Moldova                 | MDA          | EasternEurope | 3,554,150                | 45        | 0.65 | 246,029        | 300,763        | 546,792              | 255,352                     | 291,440            | 127,403           |
| Monaco                  | MCO          | EU            | 37,731                   | 100       | 0.95 | 5,805          | 0              | 5,805                | 0                           | 1,741              | 0                 |
| Mongolia                | MNG          | Eurasia       | 2,959,134                | 72        | 0.65 | 284,235        | 57,858         | 342,093              | 51,314                      | 290,779            | 188,151           |

| Country            | Country code | Cluster       | WB Human Population 2015 | Urban (%) | HDI  | Urban Dog Pop. | Rural Dog Pop. | Total Dog Population | Vax dogs, endemic countries | Current Unvax Dogs | Vax to reach goal |
|--------------------|--------------|---------------|--------------------------|-----------|------|----------------|----------------|----------------------|-----------------------------|--------------------|-------------------|
| Morocco            | MAR          | North Africa  | 34,377,511               | 60        | 0.58 | 976,111        | 1,849,185      | 2,825,295            | 395,864                     | 2,429,431          | 1,581,842         |
| Mozambique         | MOZ          | SADC          | 27,977,863               | 32        | 0.32 | 425,132        | 2,562,848      | 2,987,979            | 298,798                     | 2,689,181          | 1,792,788         |
| Myanmar            | MMR          | Asia 2        | 53,897,154               | 34        | 0.48 | 2,450,380      | 2,483,867      | 4,934,248            | 29,605                      | 4,904,642          | 3,424,368         |
| Namibia            | NAM          | SADC          | 2,458,830                | 47        | 0.63 | 54,117         | 177,235        | 231,353              | 1,157                       | 230,196            | 160,790           |
| Nauru              | NRU          | Oceania       | 10,222                   | 100       | 0.66 | 1,363          | 0              | 1,363                | 0                           | 409                | 0                 |
| Nepal              | NPL          | Asia 3        | 28,513,700               | 19        | 0.46 | 707,710        | 1,622,788      | 2,330,498            | 3,962                       | 2,326,537          | 1,627,387         |
| Netherlands        | NLD          | EU            | 16,936,520               | 90        | 0.91 | 2,357,980      | 247,638        | 2,605,618            | 0                           | 781,686            | 0                 |
| New Zealand        | NZL          | Oceania       | 4,595,700                | 86        | 0.91 | 528,714        | 44,080         | 572,794              | 0                           | 171,838            | 0                 |
| Nicaragua          | NIC          | CA & Mex*     | 6,082,032                | 59        | 0.59 | 476,661        | 334,277        | 810,938              | 0                           | 102,989            | 0                 |
| Niger              | NER          | West Africa   | 19,899,120               | 19        | 0.30 | 175,826        | 2,185,354      | 2,361,179            | 18,889                      | 2,342,290          | 1,633,936         |
| Nigeria            | NGA          | West Africa   | 182,201,962              | 48        | 0.46 | 4,106,076      | 12,858,534     | 16,964,610           | 2,085,290                   | 14,879,320         | 9,789,937         |
| Niue               | NIU          | Oceania       | 1,591                    | 100       | 0.91 | 212            | 0              | 212                  | 0                           | 64                 | 0                 |
| Norway             | NOR          | EU            | 5,195,921                | 80        | 0.94 | 643,279        | 156,093        | 799,372              | 0                           | 239,812            | 0                 |
| Oman               | OMN          | Middle East   | 4,490,541                | 78        | 0.71 | 464,867        | 70,213         | 535,079              | 80,262                      | 454,817            | 294,294           |
| Pakistan           | PAK          | Asia 3        | 188,924,874              | 39        | 0.50 | 9,763,134      | 8,091,005      | 17,854,139           | 907,883                     | 16,946,256         | 11,590,014        |
| Palau              | PLW          | Oceania       | 21,291                   | 87        | 0.78 | 2,472          | 192            | 2,664                | 0                           | 799                | 0                 |
| Panama             | PAN          | CA & Mex*     | 3,929,141                | 67        | 0.77 | 348,866        | 175,020        | 523,885              | 0                           | 488,960            | 331,794           |
| Papua New Guinea   | PNG          | Oceania       | 7,619,321                | 13        | 0.47 | 132,119        | 463,526        | 595,645              | 0                           | 178,694            | 0                 |
| Paraguay           | PRY          | Southern Cone | 6,639,123                | 60        | 0.67 | 528,173        | 357,043        | 885,216              | 0                           | 144,290            | 0                 |
| Peru               | PER          | Andean        | 31,376,670               | 79        | 0.73 | 3,288,652      | 894,904        | 4,183,556            | 1,369,595                   | 2,813,961          | 1,558,895         |
| Philippines        | PHL          | Asia 4        | 100,699,395              | 44        | 0.64 | 5,957,779      | 3,917,206      | 9,874,985            | 987,499                     | 8,887,487          | 5,924,991         |
| Poland             | POL          | EasternEurope | 37,999,494               | 61        | 0.81 | 3,539,156      | 2,306,920      | 5,846,076            | 3,647,951                   | 2,198,125          | 444,302           |
| Portugal           | PRT          | EU            | 10,348,648               | 63        | 0.81 | 1,010,474      | 581,626        | 1,592,100            | 0                           | 477,630            | 0                 |
| Qatar              | QAT          | Middle East   | 2,235,355                | 99        | 0.83 | 295,794        | 1,182          | 296,976              | 54,941                      | 242,035            | 152,943           |
| Republic of Korea  | KOR          | Asia 1        | 50,617,045               | 82        | 0.90 | 5,566,120      | 620,360        | 6,186,480            | 0                           | 1,855,944          | 0                 |
| Romania            | ROU          | EasternEurope | 19,832,389               | 55        | 0.78 | 1,664,822      | 1,386,315      | 3,051,137            | 1,424,881                   | 1,626,256          | 710,915           |
| Russian Federation | RUS          | Eurasia       | 144,096,812              | 74        | 0.76 | 14,219,089     | 2,619,136      | 16,838,225           | 6,735,290                   | 10,102,935         | 5,051,468         |
| Rwanda             | RWA          | Congo Basin   | 11,609,666               | 29        | 0.43 | 157,776        | 1,116,866      | 1,274,642            | 331,407                     | 943,235            | 560,842           |
| Saint Kitts Nevis  | KNA          | Caribbean     | 55,572                   | 32        | 0.74 | 2,375          | 5,035          | 7,410                | 0                           | 3,327              | 1,104             |
| Saint Lucia        | LCA          | Caribbean     | 184,999                  | 19        | 0.72 | 4,564          | 20,102         | 24,667               | 0                           | 11,075             | 3,675             |
| St Vincent & Gren. | VCT          | Caribbean     | 109,462                  | 51        | 0.72 | 7,378          | 7,217          | 14,595               | 0                           | 6,553              | 2,175             |

| Country                | Country code | Cluster       | WB Human Population 2015 | Urban (%) | HDI  | Urban Dog Pop. | Rural Dog Pop. | Total Dog Population | Vax dogs, endemic countries | Current Unvax Dogs | Vax to reach goal |
|------------------------|--------------|---------------|--------------------------|-----------|------|----------------|----------------|----------------------|-----------------------------|--------------------|-------------------|
| Samoa                  | WSM          | Oceania       | 193,228                  | 19        | 0.69 | 4,920          | 10,932         | 15,852               | 0                           | 4,756              | 0                 |
| San Marino             | SMR          | EU            | 31,781                   | 94        | 0.94 | 4,605          | 284            | 4,889                | 0                           | 1,467              | 0                 |
| Sao Tome & Principe    | STP          | West Africa   | 190,344                  | 65        | 0.51 | 5,844          | 8,979          | 14,823               | 0                           | 14,705             | 10,258            |
| Saudi Arabia           | SAU          | Middle East   | 31,540,372               | 83        | 0.77 | 3,495,935      | 372,088        | 3,868,023            | 715,584                     | 3,152,439          | 1,992,032         |
| Senegal                | SEN          | West Africa   | 15,129,273               | 44        | 0.46 | 312,013        | 1,150,622      | 1,462,635            | 11,701                      | 1,450,934          | 1,012,143         |
| Serbia and Montenegro  | SRB          | EasternEurope | 7,098,247                | 56        | 0.77 | 606,660        | 485,378        | 1,092,038            | 509,982                     | 582,056            | 254,445           |
| Seychelles             | SYC          | SADC          | 92,900                   | 54        | 0.77 | 2,361          | 5,789          | 8,150                | 0                           | 8,110              | 5,665             |
| Sierra Leone           | SLE          | West Africa   | 6,453,184                | 40        | 0.34 | 121,582        | 523,737        | 645,319              | 5,163                       | 640,156            | 446,560           |
| Singapore              | SGP          | Asia 1        | 5,535,002                | 100       | 0.87 | 738,000        | 0              | 738,000              | 0                           | 221,400            | 0                 |
| Slovakia               | SVK          | EasternEurope | 5,424,050                | 54        | 0.83 | 447,259        | 387,210        | 834,469              | 389,697                     | 444,772            | 194,431           |
| Slovenia               | SVN          | EasternEurope | 2,063,768                | 50        | 0.88 | 157,640        | 159,863        | 317,503              | 148,274                     | 169,229            | 73,978            |
| Solomon Islands        | SLB          | Oceania       | 583,591                  | 22        | 0.51 | 17,375         | 31,698         | 49,073               | 0                           | 14,722             | 0                 |
| Somalia                | SOM          | North Africa  | 10,787,104               | 40        | 0.28 | 201,246        | 881,175        | 1,082,421            | 1,082                       | 1,081,338          | 756,612           |
| South Africa           | ZAF          | SADC          | 54,956,920               | 65        | 0.62 | 1,679,841      | 2,614,093      | 4,293,934            | 2,705,178                   | 1,588,756          | 300,575           |
| Spain                  | ESP          | EU            | 46,418,269               | 80        | 0.88 | 5,682,953      | 1,458,319      | 7,141,272            | 0                           | 2,142,382          | 0                 |
| Sri Lanka              | LKA          | Asia 4        | 20,966,000               | 18        | 0.69 | 513,136        | 1,197,027      | 1,710,163            | 843,110                     | 867,052            | 354,004           |
| Sudan                  | SDN          | North Africa  | 52,574,694               | 34        | 0.41 | 838,368        | 4,702,877      | 5,541,245            | 11,082                      | 5,530,163          | 3,867,789         |
| Suriname               | SUR          | CA & Mex*     | 542,975                  | 66        | 0.68 | 47,813         | 24,584         | 72,397               | 49,230                      | 23,167             | 1,448             |
| Swaziland              | SWZ          | SADC          | 1,286,970                | 21        | 0.52 | 12,935         | 136,857        | 149,792              | 749                         | 149,043            | 104,106           |
| Sweden                 | SWE          | EU            | 9,798,871                | 86        | 0.90 | 1,293,677      | 213,842        | 1,507,519            | 0                           | 452,256            | 0                 |
| Switzerland            | CHE          | EU            | 8,286,976                | 74        | 0.90 | 942,318        | 332,601        | 1,274,919            | 0                           | 382,476            | 0                 |
| Syrian Arab Republic   | SYR          | Middle East   | 18,502,413               | 58        | 0.63 | 1,422,367      | 547,878        | 1,970,245            | 364,495                     | 1,605,750          | 1,014,676         |
| Tajikistan             | TJK          | Eurasia       | 8,481,855                | 27        | 0.61 | 302,881        | 434,283        | 737,164              | 108,435                     | 628,729            | 407,580           |
| Thailand               | THA          | Asia 4        | 67,959,359               | 50        | 0.68 | 4,564,513      | 2,358,427      | 6,922,940            | 3,426,855                   | 3,496,085          | 1,419,203         |
| Macedonia <sup>g</sup> | MKD          | EasternEurope | 2,078,453                | 76        | 0.73 | 242,699        | 77,063         | 319,762              | 149,329                     | 170,433            | 74,505            |
| Timor-Leste            | TLS          | Indonesia     | 1,245,015                | 33        | 0.50 | 54,399         | 58,533         | 112,932              | 0                           | 86,054             | 52,175            |
| Togo                   | TGO          | West Africa   | 7,304,578                | 40        | 0.44 | 137,698        | 592,618        | 730,317              | 60,312                      | 670,004            | 450,909           |
| Tonga                  | TON          | Oceania       | 106,170                  | 24        | 0.70 | 3,357          | 5,664          | 9,021                | 0                           | 2,706              | 0                 |
| Trinidad and Tobago    | TTO          | Caribbean     | 1,360,088                | 8         | 0.76 | 15,315         | 166,030        | 181,345              | 0                           | 81,424             | 27,020            |
| Tunisia                | TUN          | North Africa  | 11,107,800               | 67        | 0.70 | 350,221        | 497,720        | 847,940              | 410,827                     | 437,113            | 182,731           |

| Country               | Country code | Cluster       | WB Human Population 2015 | Urban (%) | HDI  | Urban Dog Pop. | Rural Dog Pop. | Total Dog Population | Vax dogs, endemic countries | Current Unvax Dogs | Vax to reach goal |
|-----------------------|--------------|---------------|--------------------------|-----------|------|----------------|----------------|----------------------|-----------------------------|--------------------|-------------------|
| Turkey                | TUR          | EasternEurope | 78,665,830               | 73        | 0.70 | 8,882,824      | 3,219,611      | 12,102,435           | 5,651,837                   | 6,450,598          | 2,819,867         |
| Turkmenistan          | TKM          | Eurasia       | 5,373,502                | 50        | 0.69 | 358,499        | 187,746        | 546,244              | 115,258                     | 430,987            | 267,113           |
| Tuvalu                | TUV          | Oceania       | 9,916                    | 60        | 0.58 | 790            | 279            | 1,069                | 0                           | 321                | 0                 |
| Uganda                | UGA          | SADC          | 39,032,383               | 16        | 0.45 | 296,444        | 4,425,376      | 4,721,819            | 472,182                     | 4,249,637          | 2,833,091         |
| Ukraine               | UKR          | EasternEurope | 45,198,200               | 70        | 0.73 | 4,846,290      | 2,107,279      | 6,953,569            | 3,247,317                   | 3,706,252          | 1,620,182         |
| U. Arab Emirates      | ARE          | Middle East   | 9,156,963                | 86        | 0.85 | 1,044,394      | 92,588         | 1,136,982            | 210,342                     | 926,640            | 585,546           |
| United Kingdom        | GBR          | EU            | 65,138,232               | 83        | 0.86 | 8,276,764      | 1,744,502      | 10,021,266           | 0                           | 3,006,380          | 0                 |
| Tanzania <sup>h</sup> | TZA          | SADC          | 53,470,420               | 32        | 0.47 | 797,214        | 4,941,823      | 5,739,037            | 28,695                      | 5,710,341          | 3,988,630         |
| USA <sup>i</sup>      | USA          | NorthAmerica  | 321,418,820              | 82        | 0.91 | 34,977,653     | 7,878,190      | 42,855,843           | 0                           | 9,974,122          | 0                 |
| Uruguay               | URY          | Southern Cone | 3,431,555                | 95        | 0.78 | 436,087        | 21,454         | 457,541              | 0                           | 161,054            | 23,792            |
| Uzbekistan            | UZB          | Eurasia       | 31,299,500               | 36        | 0.64 | 1,517,608      | 1,392,828      | 2,910,436            | 1,173,892                   | 1,736,544          | 863,413           |
| Vanuatu               | VUT          | Oceania       | 264,652                  | 26        | 0.62 | 9,220          | 13,672         | 22,891               | 0                           | 6,867              | 0                 |
| Venezuela             | VEN          | Andean        | 31,108,083               | 89        | 0.74 | 3,691,078      | 456,667        | 4,147,744            | 853,144                     | 3,294,600          | 2,050,277         |
| Viet Nam              | VNM          | Asia 2        | 91,703,800               | 34        | 0.59 | 4,107,474      | 4,258,583      | 8,366,058            | 2,091,514                   | 6,274,543          | 3,764,726         |
| Yemen                 | YEM          | Middle East   | 26,832,215               | 35        | 0.46 | 1,238,074      | 1,227,039      | 2,465,113            | 456,046                     | 2,009,067          | 1,269,533         |
| Zambia                | ZMB          | SADC          | 16,211,767               | 41        | 0.43 | 312,933        | 1,294,269      | 1,607,202            | 321,440                     | 1,285,761          | 803,601           |
| Zimbabwe              | ZWE          | SADC          | 15,602,751               | 32        | 0.38 | 238,281        | 1,425,838      | 1,664,119            | 185,589                     | 1,478,529          | 979,294           |

**Notes:** WB denotes World Bank; HDI denotes Human Development Index; Vax dogs denotes vaccinated dogs; Unvax dogs denotes unvaccinated dogs. <sup>a</sup> Democratic People's Republic of Korea. <sup>b</sup> Democratic Republic of the Congo. <sup>c</sup> Islamic Republic of Iran. <sup>d</sup> People's Democratic Republic. <sup>e</sup> Federated States of Micronesia. <sup>f</sup> Saint Vincent and the Grenadines. <sup>g</sup> The former Yugoslav Republic of Macedonia. <sup>h</sup> United Republic of Tanzania. <sup>i</sup> United States of America. <sup>j</sup> Bolivarian Republic of Venezuela. \* CA & Mex. denotes Central America and Mexico. The specific numbers or estimates were derived from (1-6).



## 1.2 Vaccination costs

**Table S2.** Estimates of the costs of vaccination by dog rabies endemic country for the Global Dog Rabies Elimination Pathway (GDREP), 2017-2030, by phase of massive vaccine implementation

| Country code | Cluster       | NPV Phase I <sup>a</sup> | NPV Phase II <sup>b</sup> | NPV Phase III <sup>c</sup> | NPV total   |
|--------------|---------------|--------------------------|---------------------------|----------------------------|-------------|
| AFG          | Eurasia       | 1,415,799                | 8,250,414                 | 23,141,085                 | 32,807,298  |
| ALB          | EasternEurope | -                        | 1,071,859                 | 4,097,611                  | 5,169,470   |
| DZA          | North Africa  | -                        | 8,813,392                 | 25,888,349                 | 34,701,740  |
| AND          | EU            | -                        | -                         | -                          | -           |
| AGO          | Congo Basin   | 1,139,743                | 7,049,906                 | 19,754,220                 | 27,943,870  |
| ATG          | Caribbean     | -                        | -                         | -                          | -           |
| ARG          | Southern Cone | -                        | 17,750,433                | 51,811,992                 | 69,562,424  |
| ARM          | EasternEurope | -                        | 1,119,549                 | 4,279,922                  | 5,399,471   |
| AUS          | Oceania       | -                        | -                         | -                          | -           |
| AUT          | EU            | -                        | -                         | -                          | -           |
| AZE          | Eurasia       | -                        | 4,548,749                 | 13,289,507                 | 17,838,255  |
| BHS          | Caribbean     | -                        | -                         | -                          | -           |
| BHR          | Middle East   | -                        | 535,394                   | 1,555,817                  | 2,091,210   |
| BGD          | Asia 3        | 10,836,721               | 42,744,548                | 120,873,135                | 174,454,405 |
| BRB          | Caribbean     | -                        | -                         | -                          | -           |
| BLR          | EasternEurope | -                        | 3,529,252                 | 13,491,976                 | 17,021,228  |
| BEL          | EU            | -                        | -                         | -                          | -           |
| BLZ          | CA & Mex*     | -                        | -                         | -                          | -           |
| BEN          | West Africa   | 514,002                  | 3,066,346                 | 8,597,191                  | 12,177,539  |
| BTN          | Asia 3        | 74,260                   | 209,845                   | 599,303                    | 883,408     |
| BOL          | Andean        | -                        | -                         | 13,985,241                 | 13,985,241  |
| BIH          | EasternEurope | -                        | 1,413,636                 | 5,404,188                  | 6,817,824   |
| BWA          | SADC          | 90,458                   | 559,531                   | 1,567,837                  | 2,217,826   |
| BRA          | Brazil        | -                        | 41,611,672                | 263,143,254                | 304,754,926 |
| BRN          | Asia 1        | -                        | -                         | -                          | -           |
| BGR          | EasternEurope | -                        | 2,662,981                 | 10,180,309                 | 12,843,290  |
| BFA          | West Africa   | 965,271                  | 5,758,453                 | 16,145,118                 | 22,868,843  |
| BDI          | Congo Basin   | 657,871                  | 4,069,274                 | 11,402,326                 | 16,129,470  |
| CIV          | West Africa   | 972,462                  | 5,801,353                 | 16,265,398                 | 23,039,214  |
| CMR          | Asia 2        | 618,918                  | 3,781,884                 | 10,599,150                 | 14,999,953  |
| CAN          | West Africa   | 997,969                  | 5,953,517                 | 16,692,022                 | 23,643,508  |
| CSS          | NorthAmerica  | -                        | -                         | -                          | -           |
| CPV          | West Africa   | -                        | -                         | -                          | -           |
| CAF          | Congo Basin   | 231,381                  | 1,431,210                 | 4,010,328                  | 5,672,919   |
| TCD          | West Africa   | 793,061                  | 4,731,111                 | 13,264,732                 | 18,788,903  |
| CHL          | Southern Cone | -                        | -                         | -                          | -           |
| CHN          | China         | 35,620,469               | 80,728,435                | 232,531,892                | 348,880,796 |

| Country code | Cluster       | NPV Phase I <sup>a</sup> | NPV Phase II <sup>b</sup> | NPV Phase III <sup>c</sup> | NPV total     |
|--------------|---------------|--------------------------|---------------------------|----------------------------|---------------|
| COL          | Andean        | -                        | -                         | 62,891,245                 | 62,891,245    |
| COM          | SADC          | -                        | -                         | -                          | -             |
| COG          | Congo Basin   | 160,830                  | 1,049,243                 | 2,937,570                  | 4,147,643     |
| COK          | Oceania       | -                        | -                         | -                          | -             |
| CRI          | CA & Mex*     | -                        | -                         | -                          | -             |
| HRV          | EasternEurope | -                        | 1,567,222                 | 5,991,334                  | 7,558,556     |
| CUB          | Caribbean     | -                        | 2,155,091                 | 14,419,639                 | 16,574,731    |
| CYP          | EasternEurope | -                        | -                         | -                          | -             |
| CZE          | EasternEurope | -                        | 3,914,424                 | 14,964,448                 | 18,878,871    |
| PRK          | Asia 2        | 1,305,724                | 7,978,597                 | 22,360,903                 | 31,645,224    |
| COD          | Congo Basin   | 3,569,458                | 22,078,960                | 61,866,446                 | 87,514,864    |
| DNK          | EU            | -                        | -                         | -                          | -             |
| DJI          | North Africa  | 26,793                   | 174,285                   | 487,967                    | 689,045       |
| DMA          | Caribbean     | -                        | -                         | -                          | -             |
| DOM          | Caribbean     | -                        | 4,264,298                 | 12,564,203                 | 16,828,501    |
| ECU          | Andean        | -                        | -                         | 21,052,589                 | 21,052,589    |
| EGY          | North Africa  | -                        | 27,099,404                | 79,601,456                 | 106,700,860   |
| SLV          | CA & Mex*     | -                        | 1,176,138                 | 7,756,498                  | 8,932,637     |
| GNQ          | Congo Basin   | 39,942                   | 247,062                   | 692,282                    | 979,286       |
| ERI          | North Africa  | 239,485                  | 1,557,792                 | 4,361,554                  | 6,158,831     |
| EST          | EasternEurope | -                        | 486,741                   | 1,860,764                  | 2,347,505     |
| ETH          | SADC          | 5,542,703                | 34,284,511                | 96,067,063                 | 135,894,278   |
| FJI          | Oceania       | -                        | -                         | -                          | -             |
| FIN          | EU            | -                        | -                         | -                          | -             |
| FRA          | EU            | -                        | -                         | -                          | -             |
| GUF          | Americas      | -                        | -                         | -                          | -             |
| GAB          | Congo Basin   | 49,322                   | 294,700                   | 826,236                    | 1,170,257     |
| GMB          | West Africa   | 80,609                   | 480,884                   | 1,348,267                  | 1,909,760     |
| GEO          | Eurasia       | -                        | 1,733,939                 | 5,065,830                  | 6,799,769     |
| DEU          | EU            | -                        | -                         | -                          | -             |
| GHA          | West Africa   | 1,175,782                | 7,014,283                 | 19,666,119                 | 27,856,184    |
| GRC          | EasternEurope | -                        | -                         | -                          | -             |
| GRD          | Caribbean     | -                        | -                         | -                          | -             |
| GTM          | CA & Mex*     | -                        | 3,022,108                 | 20,690,759                 | 23,712,867    |
| GIN          | Congo Basin   | 610,425                  | 3,775,800                 | 10,579,996                 | 14,966,221    |
| GNB          | West Africa   | 82,857                   | 494,292                   | 1,385,859                  | 1,963,008     |
| GUY          | CA & Mex*     | -                        | 151,869                   | 971,160                    | 1,123,029     |
| HTI          | Caribbean     | -                        | 4,442,142                 | 12,782,202                 | 17,224,343    |
| HND          | CA & Mex*     | -                        | -                         | 10,530,048                 | 10,530,048    |
| HUN          | EasternEurope | -                        | 3,652,305                 | 13,962,395                 | 17,614,700    |
| ISL          | EU            | -                        | -                         | -                          | -             |
| IND          | India         | 154,617,673              | 337,558,162               | 973,900,196                | 1,466,076,031 |
| IDN          | Indonesia     | -                        | 81,605,313                | 239,756,359                | 321,361,672   |

| Country code | Cluster       | NPV Phase I <sup>a</sup> | NPV Phase II <sup>b</sup> | NPV Phase III <sup>c</sup> | NPV total   |
|--------------|---------------|--------------------------|---------------------------|----------------------------|-------------|
| IRN          | Middle East   | -                        | 28,392,831                | 82,453,545                 | 110,846,376 |
| IRQ          | Middle East   | -                        | 12,786,348                | 37,156,231                 | 49,942,579  |
| IRL          | EU            | -                        | -                         | -                          | -           |
| ISR          | Middle East   | -                        | 1,495,542                 | 10,213,362                 | 11,708,904  |
| ITA          | EU            | -                        | -                         | -                          | -           |
| JAM          | Caribbean     | -                        | -                         | -                          | -           |
| JPN          | Asia 1        | -                        | -                         | -                          | -           |
| JOR          | Middle East   | -                        | 2,876,763                 | 8,359,672                  | 11,236,435  |
| KAZ          | Eurasia       | -                        | 5,572,981                 | 16,281,878                 | 21,854,860  |
| KEN          | SADC          | 2,450,347                | 15,156,676                | 42,469,829                 | 60,076,851  |
| KIR          | Oceania       | -                        | -                         | -                          | -           |
| KWT          | Middle East   | -                        | 1,585,754                 | 4,608,090                  | 6,193,844   |
| KGZ          | Eurasia       | -                        | 1,689,323                 | 4,935,482                  | 6,624,805   |
| LAO          | Asia 2        | 336,115                  | 1,873,897                 | 5,260,059                  | 7,470,071   |
| LVA          | EasternEurope | -                        | 733,986                   | 2,805,957                  | 3,539,943   |
| LBN          | Middle East   | -                        | 2,263,215                 | 6,576,743                  | 8,839,957   |
| LSO          | SADC          | 112,105                  | 693,428                   | 1,943,024                  | 2,748,558   |
| LBR          | West Africa   | 201,602                  | 1,202,683                 | 3,371,992                  | 4,776,276   |
| LBY          | North Africa  | -                        | 1,263,275                 | 3,710,727                  | 4,974,002   |
| LTU          | EasternEurope | -                        | 1,079,662                 | 4,127,440                  | 5,207,102   |
| LUX          | EU            | -                        | -                         | -                          | -           |
| MDG          | SADC          | 1,194,032                | 7,385,714                 | 20,695,172                 | 29,274,918  |
| MWI          | SADC          | 982,939                  | 6,079,989                 | 17,036,459                 | 24,099,386  |
| MYS          | Asia 1        | -                        | -                         | -                          | -           |
| MDV          | Asia 1        | -                        | -                         | -                          | -           |
| MLI          | West Africa   | 862,055                  | 5,142,706                 | 14,418,732                 | 20,423,493  |
| MLT          | EasternEurope | -                        | -                         | -                          | -           |
| MHL          | Oceania       | -                        | -                         | -                          | -           |
| MRT          | West Africa   | 164,291                  | 980,099                   | 2,747,928                  | 3,892,319   |
| MUS          | SADC          | -                        | -                         | -                          | -           |
| MEX          | CA & Mex*     | -                        | -                         | 165,633,134                | 165,633,134 |
| FSM          | Oceania       | -                        | -                         | -                          | -           |
| MDA          | EasternEurope | -                        | 1,318,563                 | 5,040,734                  | 6,359,298   |
| MCO          | EU            | -                        | -                         | -                          | -           |
| MNG          | Eurasia       | 444,848                  | 971,183                   | 2,801,991                  | 4,218,021   |
| MAR          | North Africa  | 3,514,481                | 8,037,066                 | 23,141,227                 | 34,692,774  |
| MOZ          | SADC          | 3,032,571                | 8,569,429                 | 24,473,727                 | 36,075,727  |
| MMR          | Asia 2        | 2,359,965                | 14,420,511                | 40,415,080                 | 57,195,556  |
| NAM          | SADC          | 109,331                  | 676,270                   | 1,894,946                  | 2,680,548   |
| NRU          | Oceania       | -                        | -                         | -                          | -           |
| NPL          | Asia 3        | 1,057,427                | 6,816,780                 | 19,088,480                 | 26,962,687  |
| NLD          | EU            | -                        | -                         | -                          | -           |
| NZL          | Oceania       | -                        | -                         | -                          | -           |
| NIC          | CA & Mex*     | -                        | -                         | -                          | -           |

| Country code | Cluster       | NPV Phase I <sup>a</sup> | NPV Phase II <sup>b</sup> | NPV Phase III <sup>c</sup> | NPV total   |
|--------------|---------------|--------------------------|---------------------------|----------------------------|-------------|
| NER          | West Africa   | 1,156,271                | 6,897,887                 | 19,339,778                 | 27,393,936  |
| NGA          | West Africa   | 19,437,584               | 48,428,244                | 138,952,511                | 206,818,339 |
| NIU          | Oceania       | -                        | -                         | -                          | -           |
| NOR          | EU            | -                        | -                         | -                          | -           |
| OMN          | Middle East   | 695,802                  | 1,519,060                 | 4,382,690                  | 6,597,551   |
| PAK          | Asia 3        | 13,110,810               | 51,714,504                | 146,238,398                | 211,063,712 |
| PLW          | Oceania       | -                        | -                         | -                          | -           |
| PAN          | CA & Mex*     | -                        | -                         | -                          | -           |
| PNG          | Oceania       | -                        | -                         | -                          | -           |
| PRY          | Southern Cone | -                        | -                         | -                          | -           |
| PER          | Andean        | -                        | 13,098,397                | 37,443,788                 | 50,542,185  |
| PHL          | Asia 4        | 10,022,355               | 28,321,142                | 80,883,322                 | 119,226,820 |
| POL          | EasternEurope | -                        | 8,039,137                 | 55,510,239                 | 63,549,376  |
| PRT          | EU            | -                        | -                         | -                          | -           |
| QAT          | Middle East   | -                        | 914,682                   | 2,658,002                  | 3,572,684   |
| KOR          | Asia 1        | -                        | -                         | -                          | -           |
| ROU          | EasternEurope | -                        | 7,357,669                 | 28,127,627                 | 35,485,295  |
| RUS          | Eurasia       | -                        | 40,007,175                | 155,227,165                | 195,234,340 |
| RWA          | Congo Basin   | -                        | 3,865,242                 | 11,408,339                 | 15,273,581  |
| KNA          | Caribbean     | -                        | -                         | -                          | -           |
| LCA          | Caribbean     | -                        | -                         | -                          | -           |
| VCT          | Caribbean     | -                        | -                         | -                          | -           |
| WSM          | Oceania       | -                        | -                         | -                          | -           |
| SMR          | EU            | -                        | -                         | -                          | -           |
| STP          | West Africa   | -                        | -                         | -                          | -           |
| SAU          | Middle East   | -                        | 11,913,465                | 34,619,695                 | 46,533,160  |
| SEN          | West Africa   | 716,253                  | 4,272,903                 | 11,980,044                 | 16,969,201  |
| SRB          | EasternEurope | -                        | 2,633,397                 | 10,067,211                 | 12,700,608  |
| SYC          | SADC          | -                        | -                         | -                          | -           |
| SLE          | West Africa   | 316,013                  | 1,885,217                 | 5,285,629                  | 7,486,859   |
| SGP          | Asia 1        | -                        | -                         | -                          | -           |
| SVK          | EasternEurope | -                        | 2,012,282                 | 7,692,752                  | 9,705,034   |
| SVN          | EasternEurope | -                        | 765,643                   | 2,926,974                  | 3,692,617   |
| SLB          | Oceania       | -                        | -                         | -                          | -           |
| SOM          | North Africa  | 486,806                  | 3,166,554                 | 8,865,815                  | 12,519,175  |
| ZAF          | SADC          | -                        | 5,955,217                 | 40,772,187                 | 46,727,404  |
| ESP          | EU            | -                        | -                         | -                          | -           |
| LKA          | Asia 4        | -                        | 4,201,703                 | 15,765,538                 | 19,967,241  |
| SDN          | North Africa  | 2,523,743                | 16,207,350                | 45,386,835                 | 64,117,928  |
| SUR          | CA & Mex*     | -                        | 107,499                   | 687,428                    | 794,927     |
| SWZ          | SADC          | 70,788                   | 437,860                   | 1,226,908                  | 1,735,557   |
| SWE          | EU            | -                        | -                         | -                          | -           |
| CHE          | EU            | -                        | -                         | -                          | -           |
| SYR          | Middle East   | -                        | 6,068,332                 | 17,634,148                 | 23,702,481  |

| Country code | Cluster       | NPV Phase I <sup>a</sup> | NPV Phase II <sup>b</sup> | NPV Phase III <sup>c</sup> | NPV total   |
|--------------|---------------|--------------------------|---------------------------|----------------------------|-------------|
| TJK          | Eurasia       | 946,371                  | 2,094,009                 | 6,037,912                  | 9,078,293   |
| THA          | Asia 4        | -                        | 17,033,195                | 63,820,765                 | 80,853,960  |
| MKD          | EasternEurope | -                        | 771,091                   | 2,947,802                  | 3,718,892   |
| TLS          | Indonesia     | -                        | -                         | -                          | -           |
| TGO          | West Africa   | 668,601                  | 2,101,908                 | 5,981,825                  | 8,752,334   |
| TON          | Oceania       | -                        | -                         | -                          | -           |
| TTO          | Caribbean     | -                        | -                         | -                          | -           |
| TUN          | North Africa  | -                        | 2,070,707                 | 7,816,936                  | 9,887,643   |
| TUR          | EasternEurope | -                        | 29,184,437                | 111,569,166                | 140,753,603 |
| TKM          | Eurasia       | -                        | 1,673,417                 | 4,889,011                  | 6,562,428   |
| TUV          | Oceania       | -                        | -                         | -                          | -           |
| UGA          | SADC          | 4,792,285                | 13,542,026                | 38,675,137                 | 57,009,449  |
| UKR          | EasternEurope | -                        | 16,768,195                | 64,103,125                 | 80,871,320  |
| ARE          | Middle East   | -                        | 3,501,892                 | 10,176,252                 | 13,678,143  |
| GBR          | EU            | -                        | -                         | -                          | -           |
| TZA          | SADC          | 2,712,118                | 16,775,866                | 47,006,889                 | 66,494,874  |
| USA          | NorthAmerica  | -                        | -                         | -                          | -           |
| URY          | Southern Cone | -                        | -                         | -                          | -           |
| UZB          | Eurasia       | -                        | 6,910,949                 | 26,830,545                 | 33,741,494  |
| VUT          | Oceania       | -                        | -                         | -                          | -           |
| VEN          | Andean        | -                        | 12,720,572                | 37,123,266                 | 49,843,838  |
| VNM          | Asia 2        | -                        | 25,422,416                | 74,878,140                 | 100,300,556 |
| YEM          | Middle East   | -                        | 7,592,520                 | 22,063,330                 | 29,655,850  |
| ZMB          | SADC          | -                        | 4,934,870                 | 14,384,824                 | 19,319,693  |
| ZWE          | SADC          | 1,798,437                | 4,761,507                 | 13,630,346                 | 20,190,290  |

**Notes:** NPV denotes net present value. Costs are in 2015 US dollars; we used a 3% discount rate (7).

Estimates are based on a unit cost of \$2.18 per dog vaccinated (point estimate) (8-10).

\* CA & Mex. denotes Central America and Mexico

<sup>a</sup> Current costs of dog vaccination coverage plus 10% of the vaccination costs of the gap to reach the 70% goal.

<sup>b</sup> Costs of vaccination max (current vaccination coverage, median of the corresponding year in Phase II) plus 10% of the vaccination costs of the gap to reach the 70% goal.

<sup>c</sup> Costs of vaccination of 70% of the dog population.

### 1.3 Animal health workers vaccination capacity

**Table S3.** Animal health workers in public health by country and total dog vaccines needed to achieve dog rabies elimination following the Global Dog Rabies Elimination Pathway (GDREP), 2017-2030

| Country code | Rabies cluster | WB Human Population 2015 | Public Health animal workers | Public health para-veterinarians | Total dog vaccinations required. |
|--------------|----------------|--------------------------|------------------------------|----------------------------------|----------------------------------|
| AFG          | Eurasia        | 32,526,562               | 96                           | 48                               | 17,636,799                       |
| ALB          | EasternEurope  | 2,889,167                | 39                           | 36                               | 2,657,811                        |
| DZA          | North Africa   | 39,666,519               | 1,356                        | 35                               | 17,969,523                       |
| AND          | EU             | 70,473                   | -                            | -                                | -                                |
| AGO          | Congo Basin    | 25,021,974               | -                            | -                                | 15,019,349                       |
| ATG          | Caribbean      | 91,818                   | -                            | -                                | -                                |
| ARG          | Southern Cone  | 43,416,755               | 1,833                        | 1,151                            | 35,963,545                       |
| ARM          | EasternEurope  | 3,017,712                | 613                          | -                                | 2,776,063                        |
| AUS          | Oceania        | 23,781,169               | -                            | -                                | -                                |
| AUT          | EU             | 8,611,088                | -                            | -                                | -                                |
| AZE          | Eurasia        | 9,651,349                | 4                            | -                                | 9,224,462                        |
| BHS          | Caribbean      | 388,019                  | -                            | -                                | -                                |
| BHR          | Middle East    | 1,377,237                | 34                           | 31                               | 1,079,918                        |
| BGD          | Asia 3         | 160,995,642              | 528                          | 478                              | 93,931,031                       |
| BRB          | Caribbean      | 284,215                  | -                            | -                                | -                                |
| BLR          | EasternEurope  | 9,513,000                | 129                          | 119                              | 8,751,228                        |
| BEL          | EU             | 11,285,721               | -                            | -                                | -                                |
| BLZ          | CA & Mex*      | 359,287                  | -                            | -                                | -                                |
| BEN          | West Africa    | 10,879,829               | 14                           | 13                               | 6,545,984                        |
| BTN          | Asia 3         | 774,830                  | 82                           | 77                               | 476,510                          |
| BOL          | Andean         | 10,724,705               | 407                          | 239                              | 7,006,807                        |
| BIH          | EasternEurope  | 3,810,416                | 52                           | 48                               | 3,505,290                        |
| BWA          | SADC           | 2,262,485                | 59                           | 48                               | 1,192,043                        |
| BRA          | Brazil         | 207,847,528              | 5,609                        | 3,614                            | 154,874,121                      |
| BRN          | Asia 1         | 423,188                  | -                            | -                                | -                                |
| BGR          | EasternEurope  | 7,177,991                | 1,000                        | -                                | 6,603,200                        |
| BFA          | West Africa    | 18,105,570               | 403                          | 400                              | 12,293,050                       |
| BDI          | Congo Basin    | 11,178,921               | 1,526                        | 1,523                            | 8,669,313                        |
| CIV          | West Africa    | 22,701,556               | 408                          | 315                              | 12,384,632                       |
| CMR          | Asia 2         | 15,577,899               | -                            | -                                | 8,062,532                        |
| CAN          | West Africa    | 23,344,179               | 16                           | -                                | 12,709,468                       |
| CSS          | NorthAmerica   | 35,851,774               | -                            | -                                | -                                |
| CPV          | West Africa    | 520,502                  | -                            | -                                | -                                |
| CAF          | Congo Basin    | 4,900,274                | 32                           | 30                               | 3,049,096                        |
| TCD          | West Africa    | 14,037,472               | 411                          | 200                              | 10,099,895                       |
| CHL          | Southern Cone  | 17,948,141               | -                            | -                                | -                                |

| <b>Country code</b> | <b>Rabies cluster</b> | <b>WB Human Population 2015</b> | <b>Public Health animal workers</b> | <b>Public health para-veterinarians</b> | <b>Total dog vaccinations required.</b> |
|---------------------|-----------------------|---------------------------------|-------------------------------------|-----------------------------------------|-----------------------------------------|
| CHN                 | China                 | 1,371,220,000                   | 22,386                              | 7,608                                   | 188,464,678                             |
| COL                 | Andean                | 48,228,704                      | 262                                 | -                                       | 31,509,420                              |
| COM                 | SADC                  | 788,474                         | -                                   | -                                       | -                                       |
| COG                 | Congo Basin           | 4,620,330                       | 24                                  | 18                                      | 2,228,918                               |
| COK                 | Oceania               | 18,027                          | -                                   | -                                       | -                                       |
| CRI                 | CA & Mex*             | 4,807,850                       | -                                   | -                                       | -                                       |
| HRV                 | EasternEurope         | 4,224,404                       | 492                                 | -                                       | 3,886,127                               |
| CUB                 | Caribbean             | 11,389,562                      | 831                                 | 260                                     | 8,422,883                               |
| CYP                 | EasternEurope         | 1,165,300                       | -                                   | -                                       | -                                       |
| CZE                 | EasternEurope         | 10,551,219                      | 419                                 | -                                       | 9,706,310                               |
| PRK                 | Asia 2                | 25,155,317                      | 567                                 | 390                                     | 17,009,428                              |
| COD                 | Congo Basin           | 77,266,814                      | 235                                 | 128                                     | 47,037,734                              |
| DNK                 | EU                    | 5,676,002                       | -                                   | -                                       | -                                       |
| DJI                 | North Africa          | 887,861                         | 20                                  | 15                                      | 370,292                                 |
| DMA                 | Caribbean             | 72,680                          | -                                   | -                                       | -                                       |
| DOM                 | Caribbean             | 10,528,391                      | 130                                 | 10                                      | 8,727,282                               |
| ECU                 | Andean                | 16,144,363                      | 630                                 | 320                                     | 10,547,650                              |
| EGY                 | North Africa          | 91,508,084                      | -                                   | -                                       | 55,252,664                              |
| SLV                 | CA & Mex*             | 6,126,583                       | 114                                 | 4                                       | 4,539,390                               |
| GNQ                 | Congo Basin           | 845,060                         | 11                                  | 11                                      | 526,349                                 |
| ERI                 | North Africa          | 5,222,000                       | 54                                  | 4                                       | 3,309,747                               |
| EST                 | EasternEurope         | 1,311,998                       | 54                                  | 7                                       | 1,206,937                               |
| ETH                 | SADC                  | 99,390,750                      | 2,494                               | 2,159                                   | 73,040,836                              |
| FJI                 | Oceania               | 892,145                         | -                                   | -                                       | -                                       |
| FIN                 | EU                    | 5,482,013                       | -                                   | -                                       | -                                       |
| FRA                 | EU                    | 66,808,385                      | -                                   | -                                       | -                                       |
| GUF                 | Americas              | 276,000                         | -                                   | -                                       | -                                       |
| GAB                 | Congo Basin           | 1,725,292                       | 23                                  | 22                                      | 629,064                                 |
| GMB                 | West Africa           | 1,990,924                       | 21                                  | 12                                      | 1,026,583                               |
| GEO                 | Eurasia               | 3,679,000                       | 862                                 | 292                                     | 3,516,275                               |
| DEU                 | EU                    | 81,413,145                      | -                                   | -                                       | -                                       |
| GHA                 | West Africa           | 27,409,893                      | 217                                 | 216                                     | 14,973,974                              |
| GRC                 | EasternEurope         | 10,823,732                      | -                                   | -                                       | -                                       |
| GRD                 | Caribbean             | 106,825                         | -                                   | -                                       | -                                       |
| GTM                 | CA & Mex*             | 16,342,897                      | 55                                  | 10                                      | 12,050,163                              |
| GIN                 | Congo Basin           | 12,608,590                      | 24                                  | -                                       | 8,044,086                               |
| GNB                 | West Africa           | 1,844,325                       | 13                                  | 11                                      | 1,055,207                               |
| GUY                 | CA & Mex*             | 767,085                         | 14                                  | 0                                       | 570,711                                 |
| HTI                 | Caribbean             | 10,711,067                      | 27                                  | 15                                      | 8,946,019                               |
| HND                 | CA & Mex*             | 8,075,060                       | 150                                 | 5                                       | 5,275,706                               |
| HUN                 | EasternEurope         | 9,844,686                       | 656                                 | 204                                     | 9,056,354                               |
| ISL                 | EU                    | 330,823                         | -                                   | -                                       | -                                       |

| <b>Country code</b> | <b>Rabies cluster</b> | <b>WB Human Population 2015</b> | <b>Public Health animal workers</b> | <b>Public health para-veterinarians</b> | <b>Total dog vaccinations required.</b> |
|---------------------|-----------------------|---------------------------------|-------------------------------------|-----------------------------------------|-----------------------------------------|
| IND                 | India                 | 1,311,050,527                   | 21,403                              | 7,274                                   | 792,189,639                             |
| IDN                 | Indonesia             | 257,563,815                     | 1,270                               | -                                       | 166,418,784                             |
| IRN                 | Middle East           | 79,109,272                      | 1,031                               | 288                                     | 57,232,345                              |
| IRQ                 | Middle East           | 36,423,395                      | 79                                  | 6                                       | 25,790,743                              |
| IRL                 | EU                    | 4,640,703                       | -                                   | -                                       | -                                       |
| ISR                 | Middle East           | 8,380,400                       | 325                                 | -                                       | 5,950,119                               |
| ITA                 | EU                    | 60,802,085                      | -                                   | -                                       | -                                       |
| JAM                 | Caribbean             | 2,725,941                       | -                                   | -                                       | -                                       |
| JPN                 | Asia 1                | 126,958,472                     | -                                   | -                                       | -                                       |
| JOR                 | Middle East           | 7,594,547                       | 464                                 | 325                                     | 5,802,584                               |
| KAZ                 | Eurasia               | 17,544,126                      | 1,041                               | 123                                     | 11,301,516                              |
| KEN                 | SADC                  | 46,050,302                      | 1,207                               | 1,103                                   | 32,290,274                              |
| KIR                 | Oceania               | 112,423                         | -                                   | -                                       | -                                       |
| KWT                 | Middle East           | 3,892,115                       | 40                                  | -                                       | 3,198,550                               |
| KGZ                 | Eurasia               | 5,957,000                       | -                                   | -                                       | 3,425,798                               |
| LAO                 | Asia 2                | 6,802,023                       | 153                                 | 106                                     | 4,016,427                               |
| LVA                 | EasternEurope         | 1,978,440                       | 188                                 | -                                       | 1,820,013                               |
| LBN                 | Middle East           | 5,850,743                       | 76                                  | 21                                      | 4,565,024                               |
| LSO                 | SADC                  | 2,135,022                       | 1                                   | -                                       | 1,477,302                               |
| LBR                 | West Africa           | 4,503,438                       | 48                                  | 28                                      | 2,567,467                               |
| LBY                 | North Africa          | 6,278,438                       | 65                                  | 5                                       | 2,575,676                               |
| LTU                 | EasternEurope         | 2,910,199                       | 533                                 | -                                       | 2,677,159                               |
| LUX                 | EU                    | 569,676                         | -                                   | -                                       | -                                       |
| MDG                 | SADC                  | 24,235,390                      | 240                                 | 74                                      | 15,734,765                              |
| MWI                 | SADC                  | 17,215,232                      | 275                                 | 226                                     | 12,953,005                              |
| MYS                 | Asia 1                | 30,331,007                      | -                                   | -                                       | -                                       |
| MDV                 | Asia 1                | 409,163                         | -                                   | -                                       | -                                       |
| MLI                 | West Africa           | 17,599,694                      | 438                                 | -                                       | 10,978,562                              |
| MLT                 | EasternEurope         | 431,333                         | -                                   | -                                       | -                                       |
| MHL                 | Oceania               | 52,993                          | -                                   | -                                       | -                                       |
| MRT                 | West Africa           | 4,067,564                       | 43                                  | 25                                      | 2,092,299                               |
| MUS                 | SADC                  | 1,262,605                       | -                                   | -                                       | -                                       |
| MEX                 | CA & Mex*             | 127,017,224                     | 2,417                               | -                                       | 82,984,586                              |
| FSM                 | Oceania               | 104,460                         | -                                   | -                                       | -                                       |
| MDA                 | EasternEurope         | 3,554,150                       | 275                                 | -                                       | 3,269,545                               |
| MCO                 | EU                    | 37,731                          | -                                   | -                                       | -                                       |
| MNG                 | Eurasia               | 2,959,134                       | 295                                 | -                                       | 2,279,195                               |
| MAR                 | North Africa          | 34,377,511                      | 131                                 | -                                       | 18,739,741                              |
| MOZ                 | SADC                  | 27,977,863                      | 446                                 | 367                                     | 19,459,216                              |
| MMR                 | Asia 2                | 53,897,154                      | 36                                  | -                                       | 30,742,829                              |
| NAM                 | SADC                  | 2,458,830                       | 84                                  | 73                                      | 1,440,748                               |
| NRU                 | Oceania               | 10,222                          | -                                   | -                                       | -                                       |
| NPL                 | Asia 3                | 28,513,700                      | 14                                  | 10                                      | 14,490,107                              |



| <b>Country code</b> | <b>Rabies cluster</b> | <b>WB Human Population 2015</b> | <b>Public Health animal workers</b> | <b>Public health para-veterinarians</b> | <b>Total dog vaccinations required.</b> |
|---------------------|-----------------------|---------------------------------|-------------------------------------|-----------------------------------------|-----------------------------------------|
| NLD                 | EU                    | 16,936,520                      | -                                   | -                                       | -                                       |
| NZL                 | Oceania               | 4,595,700                       | -                                   | -                                       | -                                       |
| NIC                 | CA & Mex*             | 6,082,032                       | -                                   | -                                       | -                                       |
| NER                 | West Africa           | 19,899,120                      | 210                                 | 124                                     | 14,725,494                              |
| NGA                 | West Africa           | 182,201,962                     | 1,454                               | 758                                     | 111,648,510                             |
| NIU                 | Oceania               | 1,591                           | -                                   | -                                       | -                                       |
| NOR                 | EU                    | 5,195,921                       | -                                   | -                                       | -                                       |
| OMN                 | Middle East           | 4,490,541                       | 206                                 | 13                                      | 3,564,966                               |
| PAK                 | Asia 3                | 188,924,874                     | 619                                 | 561                                     | 113,642,485                             |
| PLW                 | Oceania               | 21,291                          | -                                   | -                                       | -                                       |
| PAN                 | CA & Mex*             | 3,929,141                       | -                                   | -                                       | -                                       |
| PNG                 | Oceania               | 7,619,321                       | -                                   | -                                       | -                                       |
| PRY                 | Southern Cone         | 6,639,123                       | -                                   | -                                       | -                                       |
| PER                 | Andean                | 31,376,670                      | 543                                 | 234                                     | 26,261,753                              |
| PHL                 | Asia 4                | 100,699,395                     | 455                                 | 87                                      | 64,310,843                              |
| POL                 | EasternEurope         | 37,999,494                      | 611                                 | -                                       | 32,293,724                              |
| PRT                 | EU                    | 10,348,648                      | -                                   | -                                       | -                                       |
| QAT                 | Middle East           | 2,235,355                       | 29                                  | 8                                       | 1,844,963                               |
| KOR                 | Asia 1                | 50,617,045                      | -                                   | -                                       | -                                       |
| ROU                 | EasternEurope         | 19,832,389                      | 2,086                               | 1,149                                   | 18,244,272                              |
| RUS                 | Eurasia               | 144,096,812                     | 8,547                               | 1,008                                   | 100,187,439                             |
| RWA                 | Congo Basin           | 11,609,666                      | 158                                 | 145                                     | 7,918,714                               |
| KNA                 | Caribbean             | 55,572                          | -                                   | -                                       | -                                       |
| LCA                 | Caribbean             | 184,999                         | -                                   | -                                       | -                                       |
| VCT                 | Caribbean             | 109,462                         | -                                   | -                                       | -                                       |
| WSM                 | Oceania               | 193,228                         | -                                   | -                                       | -                                       |
| SMR                 | EU                    | 31,781                          | -                                   | -                                       | -                                       |
| STP                 | West Africa           | 190,344                         | -                                   | -                                       | -                                       |
| SAU                 | Middle East           | 31,540,372                      | 160                                 | -                                       | 24,030,093                              |
| SEN                 | West Africa           | 15,129,273                      | 227                                 | 195                                     | 9,121,722                               |
| SRB                 | EasternEurope         | 7,098,247                       | 160                                 | -                                       | 6,529,841                               |
| SYC                 | SADC                  | 92,900                          | -                                   | -                                       | -                                       |
| SLE                 | West Africa           | 6,453,184                       | 9                                   | 6                                       | 4,024,529                               |
| SGP                 | Asia 1                | 5,535,002                       | -                                   | -                                       | -                                       |
| SVK                 | EasternEurope         | 5,424,050                       | 722                                 | 25                                      | 4,989,709                               |
| SVN                 | EasternEurope         | 2,063,768                       | 117                                 | -                                       | 1,898,508                               |
| SLB                 | Oceania               | 583,591                         | -                                   | -                                       | -                                       |
| SOM                 | North Africa          | 10,787,104                      | 112                                 | 9                                       | 6,727,787                               |
| ZAF                 | SADC                  | 54,956,920                      | 111                                 | 84                                      | 23,745,455                              |
| ESP                 | EU                    | 46,418,269                      | -                                   | -                                       | -                                       |
| LKA                 | Asia 4                | 20,966,000                      | 95                                  | 18                                      | 10,270,381                              |
| SDN                 | North Africa          | 52,574,694                      | 547                                 | 43                                      | 34,458,235                              |
| SUR                 | CA & Mex*             | 542,975                         | 15                                  | 14                                      | 403,973                                 |

| Country code | Rabies cluster | WB Human Population 2015 | Public Health animal workers | Public health para-veterinarians | Total dog vaccinations required. |
|--------------|----------------|--------------------------|------------------------------|----------------------------------|----------------------------------|
| SWZ          | SADC           | 1,286,970                | 17                           | 14                               | 932,832                          |
| SWE          | EU             | 9,798,871                | -                            | -                                | -                                |
| CHE          | EU             | 8,286,976                | -                            | -                                | -                                |
| SYR          | Middle East    | 18,502,413               | 241                          | 67                               | 12,240,149                       |
| TJK          | Eurasia        | 8,481,855                | 503                          | 59                               | 4,904,938                        |
| THA          | Asia 4         | 67,959,359               | 307                          | 59                               | 41,589,564                       |
| MKD          | EasternEurope  | 2,078,453                | 68                           | -                                | 1,912,017                        |
| TLS          | Indonesia      | 1,245,015                | -                            | -                                | -                                |
| TGO          | West Africa    | 7,304,578                | 56                           | 55                               | 4,718,029                        |
| TON          | Oceania        | 106,170                  | -                            | -                                | -                                |
| TTO          | Caribbean      | 1,360,088                | -                            | -                                | -                                |
| TUN          | North Africa   | 11,107,800               | 339                          | 94                               | 5,085,097                        |
| TUR          | EasternEurope  | 78,665,830               | 2,988                        | 345                              | 72,366,512                       |
| TKM          | Eurasia        | 5,373,502                | 1,383                        | 300                              | 3,393,542                        |
| TUV          | Oceania        | 9,916                    | -                            | -                                | -                                |
| UGA          | SADC           | 39,032,383               | 198                          | 100                              | 30,750,847                       |
| UKR          | EasternEurope  | 45,198,200               | 5,920                        | -                                | 41,578,867                       |
| ARE          | Middle East    | 9,156,963                | 32                           | -                                | 7,063,502                        |
| GBR          | EU             | 65,138,232               | -                            | -                                | -                                |
| TZA          | SADC           | 53,470,420               | 853                          | 702                              | 35,739,851                       |
| USA          | NorthAmerica   | 321,418,820              | -                            | -                                | -                                |
| URY          | Southern Cone  | 3,431,555                | -                            | -                                | -                                |
| UZB          | Eurasia        | 31,299,500               | 2,784                        | -                                | 17,317,095                       |
| VUT          | Oceania        | 264,652                  | -                            | -                                | -                                |
| VEN          | Andean         | 31,108,083               | 538                          | 232                              | 25,767,862                       |
| VNM          | Asia 2         | 91,703,800               | 3,600                        | 2,500                            | 51,974,134                       |
| YEM          | Middle East    | 26,832,215               | 350                          | 98                               | 15,314,516                       |
| ZMB          | SADC           | 16,211,767               | 259                          | 213                              | 9,984,740                        |
| ZWE          | SADC           | 15,602,751               | 182                          | 133                              | 10,895,107                       |

**Notes:** \*CA & Mex. denotes Central America and Mexico. Source of animal health worker data: World Organization for Animal Health (11); human population: World Bank (1).

**Figure S1.** Share of vaccination doses that the current animal public health workforce (11) could potentially deliver following the Global Dog Rabies Elimination Pathway (GDREP), by country

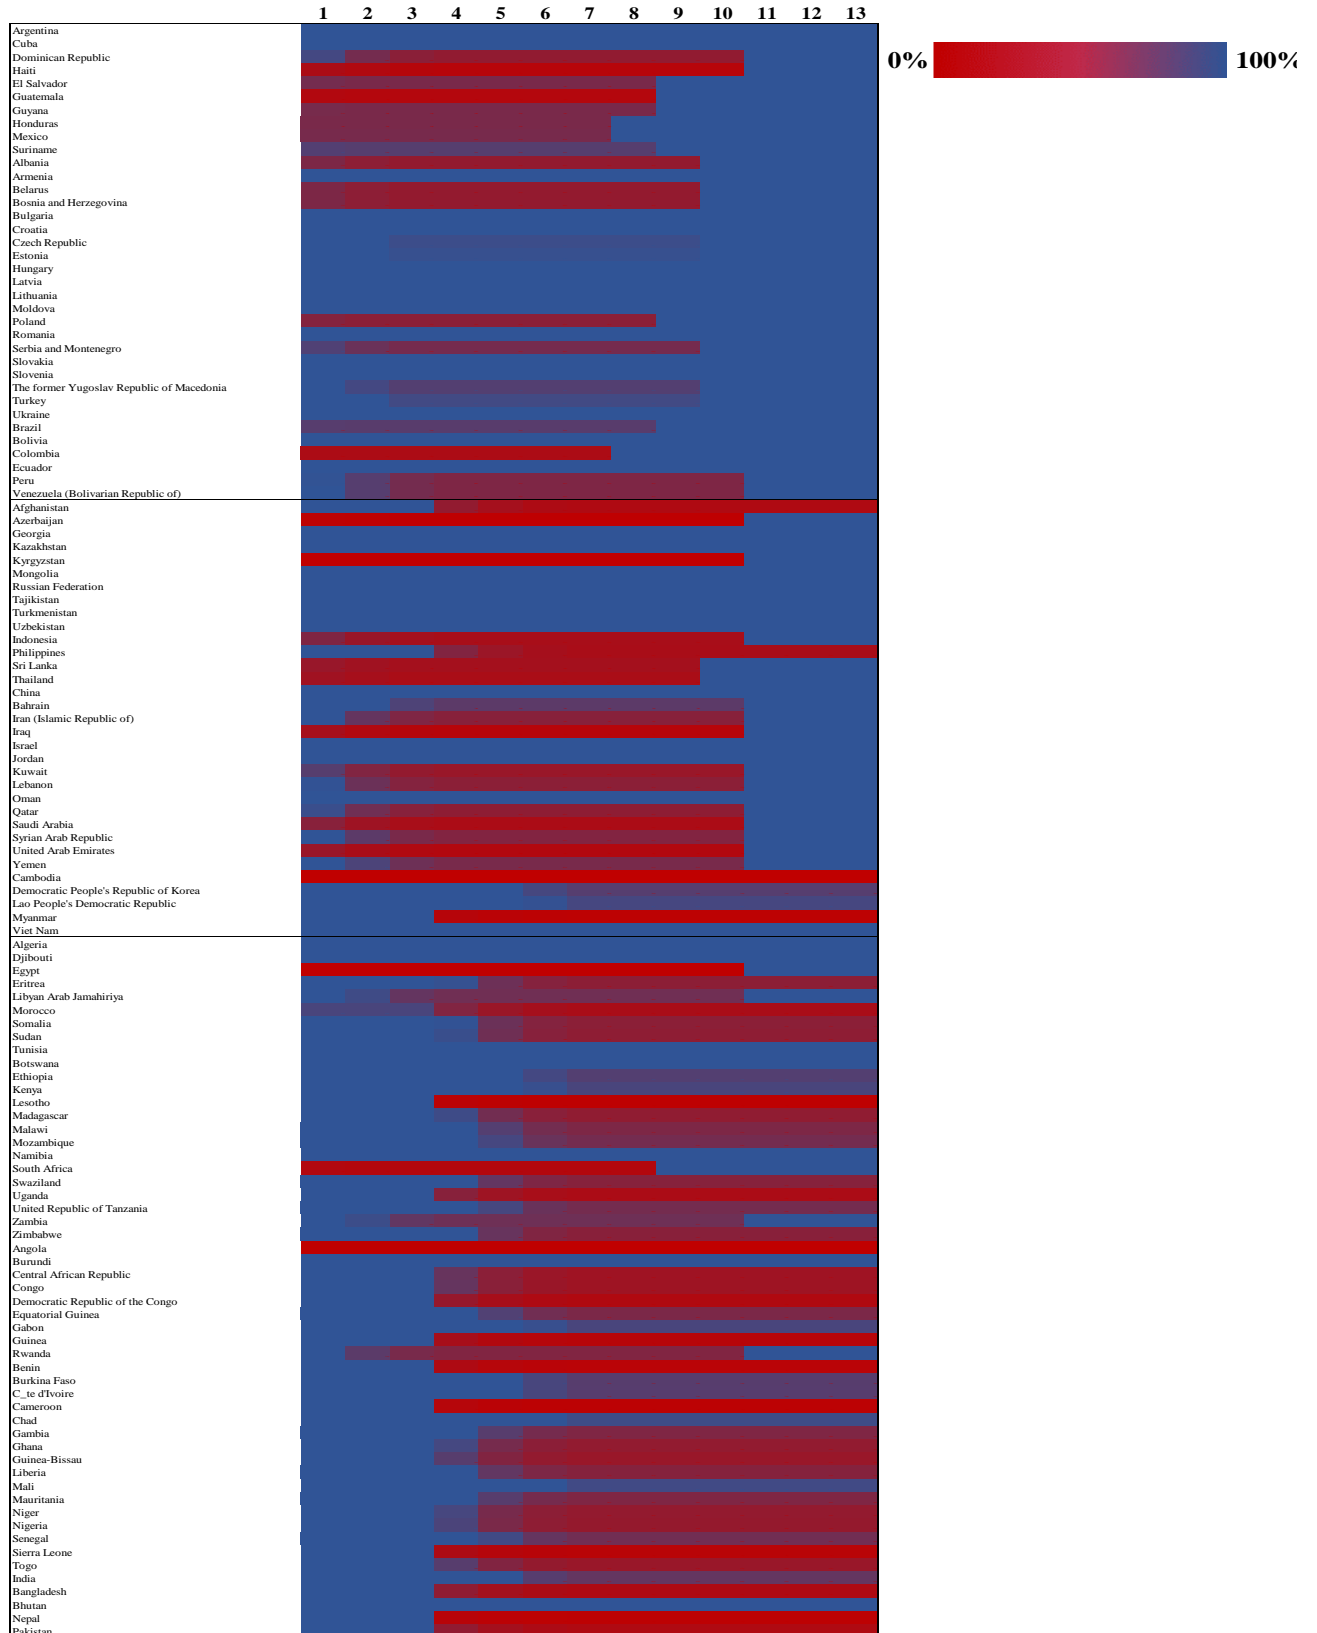

## 2 Appendix 2. Human development index and dog rabies elimination

Seventy countries were determined to be dog rabies virus free; 122 were categorized as DEC. The 70 DRFCs had a significantly higher mean HDI score of 0.78 compared to 0.60 for DEC (p < 0.05). Five mean HDI scores were calculated in accordance with the 13-year vaccination program phases and are displayed in table 3. Only 5 DEC were estimated to be vaccinating over 70% of dogs as of 2015; 56 (46%) were vaccinating less than 18% (Phase I). The remaining 61 DEC were defined as Phase II. The mean HDI score for DEC in Phase I was significantly lower than DEC in Phase II and Phase III (mean 0.46 vs 0.71, p = 0.004). Figure S2 shows the association.

**Figure S2.** Association between human development index (HDI) and dog vaccination coverage.

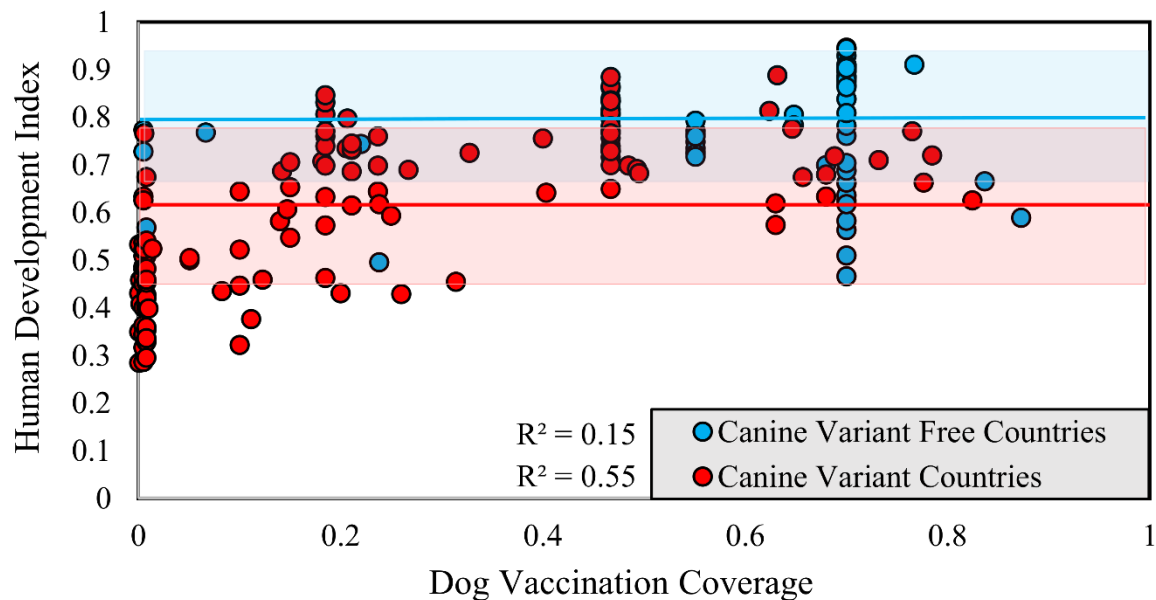

### 3 References for the supplementary material

1. World Bank. World Bank Open Data (2016) [cited 2016 October 10]. Available from: <http://data.worldbank.org/indicator/SP.URB.TOTL.IN.ZS>.
2. Knobel DL, Cleaveland S, Coleman PG, Fèvre EM, Meltzer MI, Miranda MEG, et al. Re-evaluating the burden of rabies in Africa and Asia. *Bull WHO* (2005) **83**(5):360-8.
3. Hampson K, Coudeville L, Lembo T, Sambo M, Kieffer A, Attlan M, et al. Estimating the Global Burden of Endemic Canine Rabies. *PLoS Negl Trop Dis* (2015) **9**(4):e0003709.
4. Coleman PG, Dye C. Immunization coverage required to prevent outbreaks of dog rabies. *Vaccine* (1996) **14**(3):185-6.
5. Cleaveland S, Kaare M, Tiringa P, Mlengeya T, Barrat J. A dog rabies vaccination campaign in rural Africa: impact on the incidence of dog rabies and human dog-bite injuries. *Vaccine* (2003) **21**(17):1965-73.
6. World Health Organization. WHO Expert Consultation on Rabies Geneva(2013) [cited 2016 30 March]. Available from: [http://apps.who.int/iris/bitstream/10665/85346/1/9789240690943\\_eng.pdf](http://apps.who.int/iris/bitstream/10665/85346/1/9789240690943_eng.pdf).
7. World Health Organization. WHO-CHOICE. Choosing interventions that are cost-effective Geneva: WHO\_CHOICE (2015) [cited 2015 November 20]. Available from: <http://www.who.int/choice/en/>.
8. Kayali U, Mindekem R, Hutton G, Ndoutamia A, Zinsstag J. Cost-description of a pilot parenteral vaccination campaign against rabies in dogs in N'Djaména, Chad. *Trop Med Int Health* (2006) **11**(7):1058-65.
9. Kaare M, Lembo T, Hampson K, Ernest E, Estes A, Mentzel C, et al. Rabies control in rural Africa: evaluating strategies for effective domestic dog vaccination. *Vaccine* (2009) **27**(1):152-60.
10. Lapid SMD, Miranda MEG, Garcia RG, Daguro LI, Paman MD, Madrinan FP, et al. Implementation of an intersectoral program to eliminate human and canine rabies: the Bohol Rabies Prevention and Elimination Project. *PLoS Negl Trop Dis* (2012) **6**(12):e1891.
11. World Organization for Animal Health (OIE). World Animal Health Information Database (WAHIS) Interface (2016) [cited 2016 October 1]. Available from: [http://www.oie.int/wahis\\_2/public/wahid.php/Wahidhome/Home](http://www.oie.int/wahis_2/public/wahid.php/Wahidhome/Home).
